# Supplementary material for: Spatial Distribution, Chemical Fraction and Fuzzy Comprehensive Risk Assessment of Heavy Metals in Surface Sediments from the Honghu Lake, China
Source: MDPI journal article supplement (doi:10.3390/ijerph15020207), 2018-01-26
Supplement: s1 [file s1]

Supplementary Materials

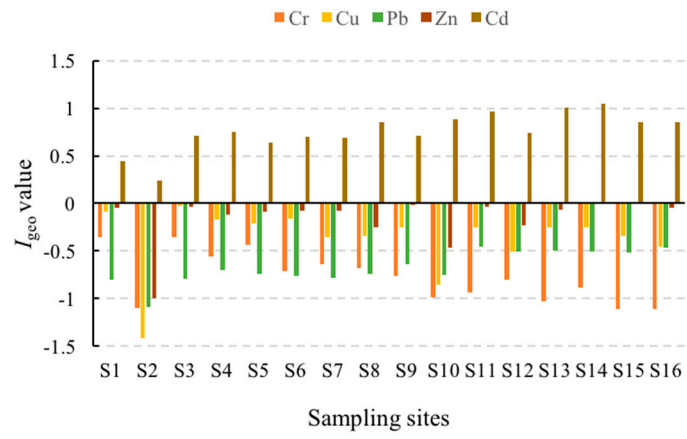

Figure S1.  $I_{geo}$  values of five heavy metals from each sampling site.

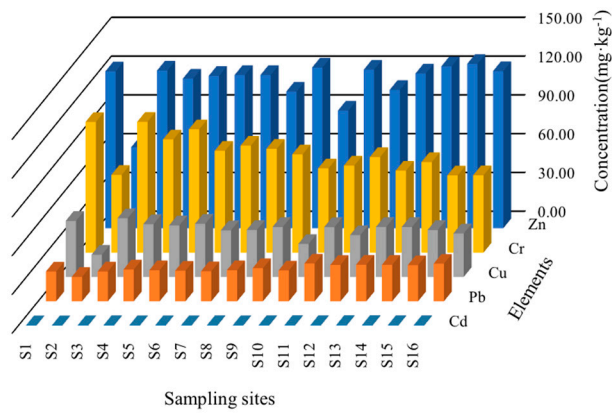

Figure S2. Concentrations of heavy metals in 16 sampling sites.

**Table S1.** The comprehensive risks of Cr, Cu, Pb, Zn and Cd in sediments from the Honghu Lake

| Sampling Sites | Elements                |                             |                         |                             |                                 |
|----------------|-------------------------|-----------------------------|-------------------------|-----------------------------|---------------------------------|
|                | Cr                      | Cu                          | Pb                      | Zn                          | Cd                              |
| S1             | (1, 0, 0, 0, 0)         | (0.452, 0.548, 0, 0, 0)     | (1, 0, 0, 0, 0)         | (0.300, 0.549, 0.151, 0, 0) | (0.147, 0.227, 0.626, 0, 0)     |
| S2             | (1, 0, 0, 0, 0)         | (0.711, 0.289, 0, 0, 0)     | (0.789, 0.211, 0, 0, 0) | (0.833, 0.167, 0, 0, 0)     | (0.205, 0.465, 0.330, 0, 0)     |
| S3             | (1, 0, 0, 0, 0)         | (0.521, 0.479, 0, 0, 0)     | (0.840, 0.160, 0, 0, 0) | (0.839, 0.161, 0, 0, 0)     | (0.055, 0.485, 0.460, 0, 0)     |
| S4             | (1, 0, 0, 0, 0)         | (0.601, 0.399, 0, 0, 0)     | (0.848, 0.152, 0, 0, 0) | (0.842, 0.158, 0, 0, 0)     | (0.037, 0.416, 0.547, 0, 0)     |
| S5             | (1, 0, 0, 0, 0)         | (0.940, 0.060, 0, 0, 0)     | (0.831, 0.169, 0, 0, 0) | (0.922, 0.078, 0, 0, 0)     | (0.082, 0.218, 0.649, 0.051, 0) |
| S6             | (1, 0, 0, 0, 0)         | (0.915, 0.085, 0, 0, 0)     | (0.854, 0.146, 0, 0, 0) | (0.817, 0.183, 0, 0, 0)     | (0.058, 0.461, 0.481, 0, 0)     |
| S7             | (1, 0, 0, 0, 0)         | (0.866, 0.134, 0, 0, 0)     | (0.856, 0.144, 0, 0, 0) | (0.922, 0.078, 0, 0, 0)     | (0.064, 0.488, 0.448, 0, 0)     |
| S8             | (1, 0, 0, 0, 0)         | (0.780, 0.220, 0, 0, 0)     | (0.877, 0.123, 0, 0, 0) | (0.806, 0.194, 0, 0, 0)     | (0, 0.550, 0.450, 0, 0)         |
| S9             | (0.966, 0.034, 0, 0, 0) | (0.514, 0.486, 0, 0, 0)     | (0.883, 0.117, 0, 0, 0) | (0.733, 0.267, 0, 0, 0)     | (0.055, 0.461, 0.484, 0, 0)     |
| S10            | (1, 0, 0, 0, 0)         | (0.676, 0.324, 0, 0, 0)     | (0.870, 0.130, 0, 0, 0) | (0.754, 0.246, 0, 0, 0)     | (0, 0.304, 0.696, 0, 0)         |
| S11            | (1, 0, 0, 0, 0)         | (0.501, 0.499, 0, 0, 0)     | (0.900, 0.100, 0, 0, 0) | (0.782, 0.218, 0, 0, 0)     | (0, 0.539, 0.461, 0, 0)         |
| S12            | (1, 0, 0, 0, 0)         | (0.300, 0.653, 0.047, 0, 0) | (0.890, 0.110, 0, 0, 0) | (0.693, 0.307, 0, 0, 0)     | (0.040, 0.349, 0.611, 0, 0)     |
| S13            | (1, 0, 0, 0, 0)         | (1, 0, 0, 0, 0)             | (0.882, 0.118, 0, 0, 0) | (0.758, 0.242, 0, 0, 0)     | (0, 0.527, 0.473, 0, 0)         |
| S14            | (1, 0, 0, 0, 0)         | (0.315, 0.685, 0, 0, 0)     | (0.916, 0.084, 0, 0, 0) | (0.769, 0.231, 0, 0, 0)     | (0, 0.581, 0.419, 0, 0)         |
| S15            | (1, 0, 0, 0, 0)         | (0.936, 0.064, 0, 0, 0)     | (0.921, 0.079, 0, 0, 0) | (0.776, 0.224, 0, 0, 0)     | (0, 0.526, 0.474, 0, 0)         |
| S16            | (1, 0, 0, 0, 0)         | (0.511, 0.489, 0, 0, 0)     | (0.890, 0.110, 0, 0, 0) | (0.770, 0.230, 0, 0, 0)     | (0, 0.528, 0.472, 0, 0)         |
